# Supplementary material for: Npr3 regulates neural crest and cranial placode progenitors formation through its dual function as clearance and signaling receptor
Source: eLife journal article supplement (doi:10.7554/elife.84036), 2023-05-10
Supplement: figures [file elife-84036-figures-v2.pdf]

---

## Figures and figure supplements

Npr3 regulates neural crest and cranial placode progenitors formation through its dual function as clearance and signaling receptor

**Arun Devotta and Hugo Juraver-Geslin *et al.***

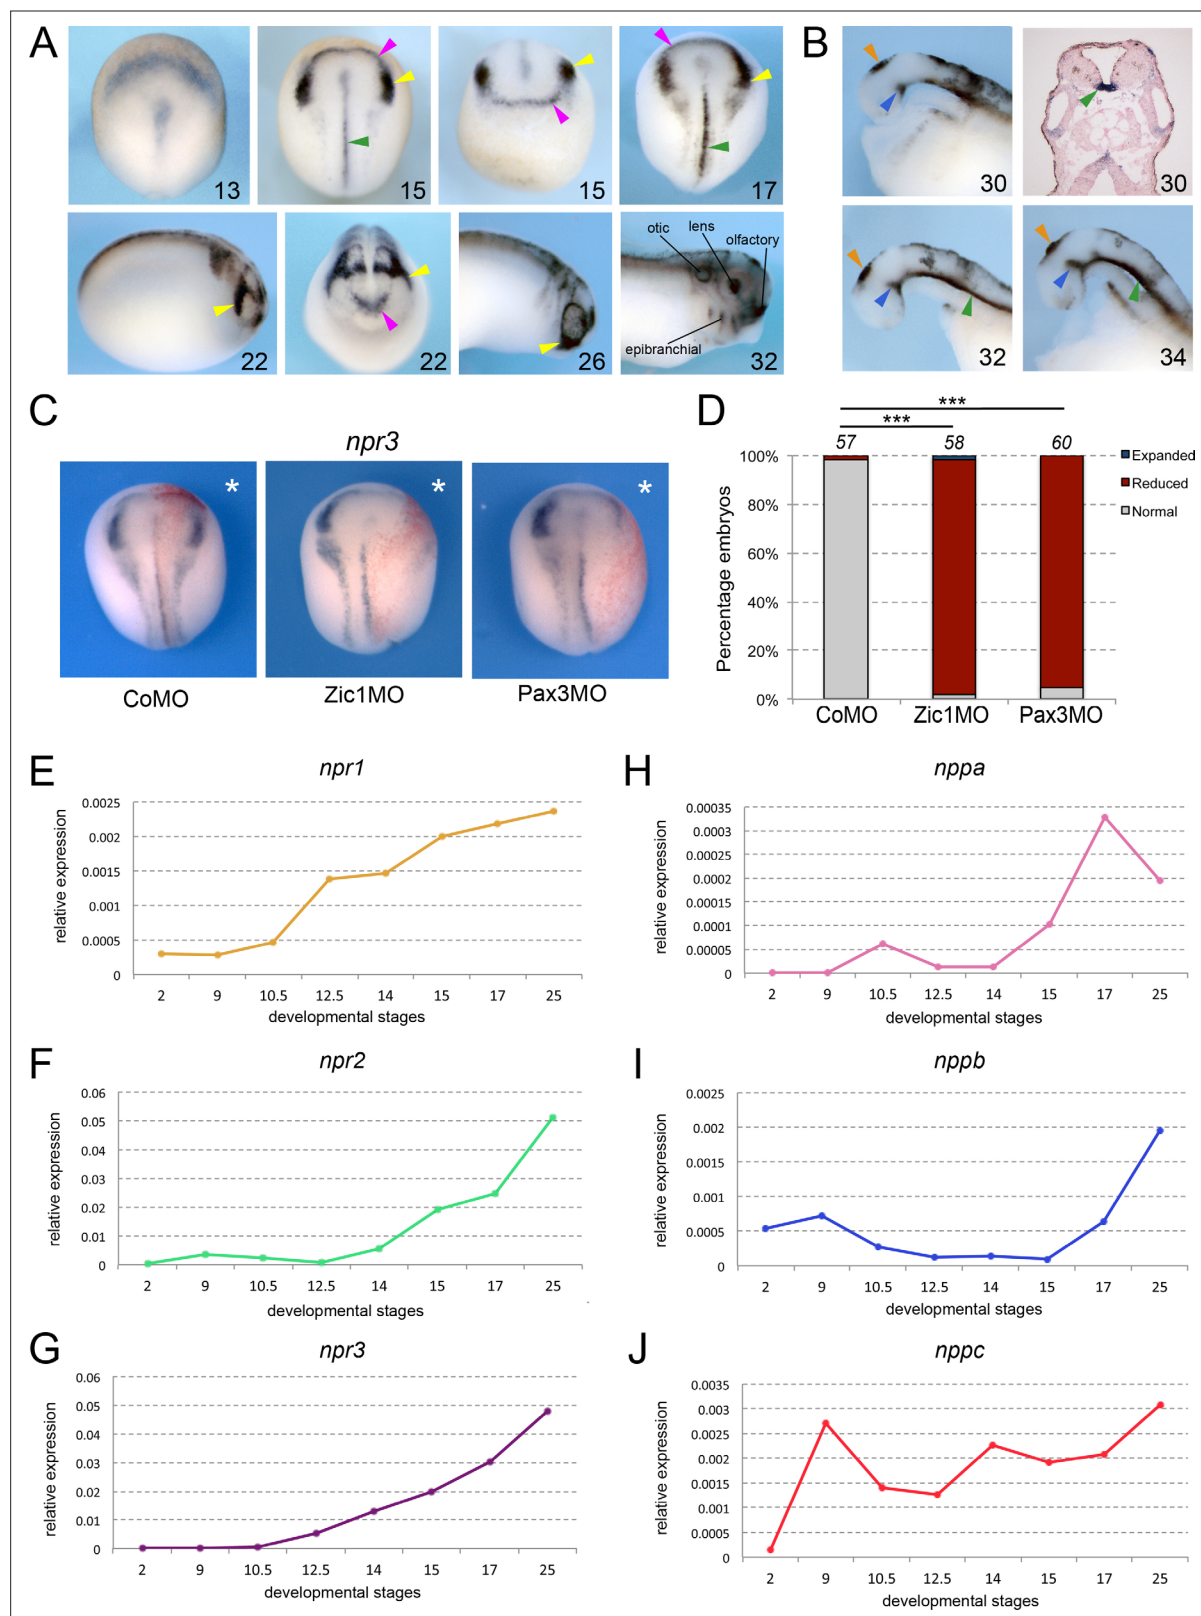

**Figure 1.** *npr3*, a target of Pax3 and Zic1, is expressed in developing NC and CP. **(A)** By ISH, *npr3* is detected at the neural plate border at neurula stages (NF stage 13–17), and persists in the NC (yellow arrowheads) and CP (purple arrowheads) forming regions (NF stage 22–26). *npr3* expression is maintained in most CP-derivatives at NF stage 32. **(B)** Dissected brain regions at NF stages 30–34 show additional *npr3* expression domains in the floor plate (green arrowheads), zona limitans intrathalamica (blue arrowheads) and pineal gland (orange arrowheads). Upper right shows a transverse section

Figure 1 continued on next page

## Figure 1 continued

through the hindbrain of a NF stage 30 embryo highlighting the floor plate expression of *npr3* (green arrowhead). The embryonic stages are indicated in the lower right corner of each panel. **(C)** Zic1 (Zic1MO) or Pax3 (Pax3MO) knockdown reduces *npr3* expression at the NPB. Injection of a CoMO did not affect *npr3* expression. The asterisks (\*) mark the injected side, also visualized by the lineage tracer Red-gal. Dorsal views, anterior to top. **(D)** Frequency of the phenotypes. The number of embryos analyzed is indicated at the top of each bar. \*\*\* $p < 0.0005$ ,  $\chi^2$  test. **(E–J)** Developmental qRT-PCR expression profile of *npr1* **(E)**, *npr2* **(F)**, *npr3* **(G)**, *nppa* **(H)**, *nppb* **(I)** and *nppc* **(J)** in *Xenopus*. NF developmental stages are indicated on the x-axis, values are normalized to ornithine decarboxylase (*odc*). A representative experiment is shown. Two additional biological replicates are shown in Figure S1.

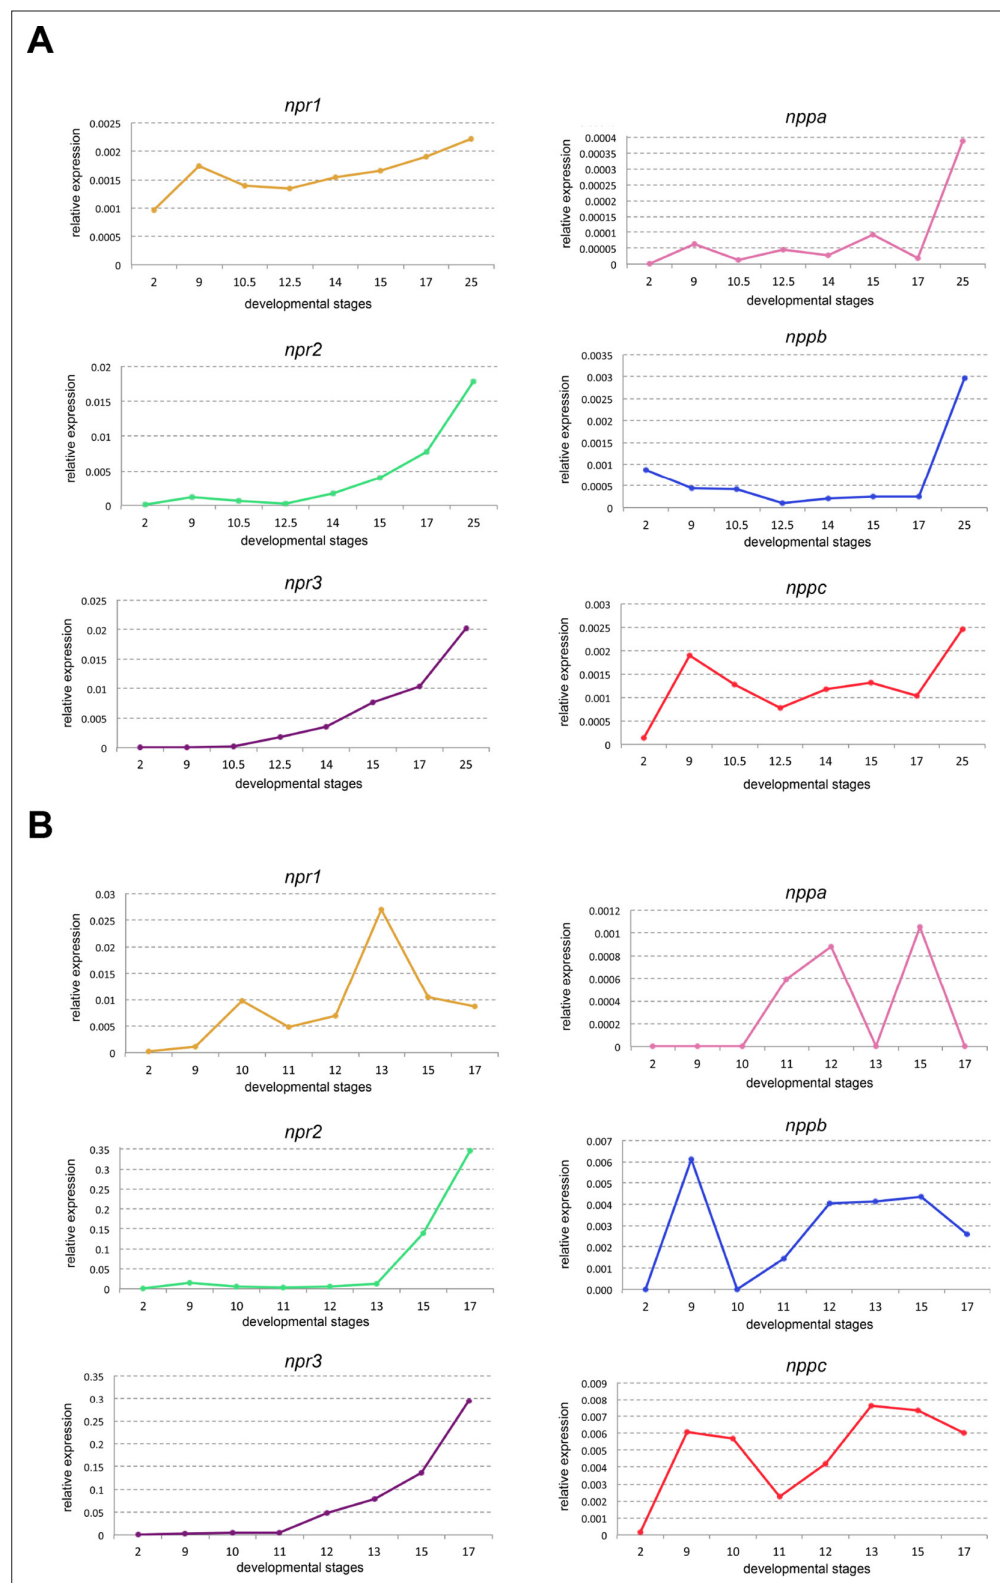

**Figure 1—figure supplement 1.** Developmental RT-PCR of natriuretic peptide signaling pathway components. Developmental qRT-PCR expression profile of *npr1*, *npr2*, *npr3*, *nppa*, *nppb* and *nppc* in two biological replicates (**A and B**) of WT *Xenopus* embryos. NF stages are indicated on x-axis, values are normalized to *odc*.



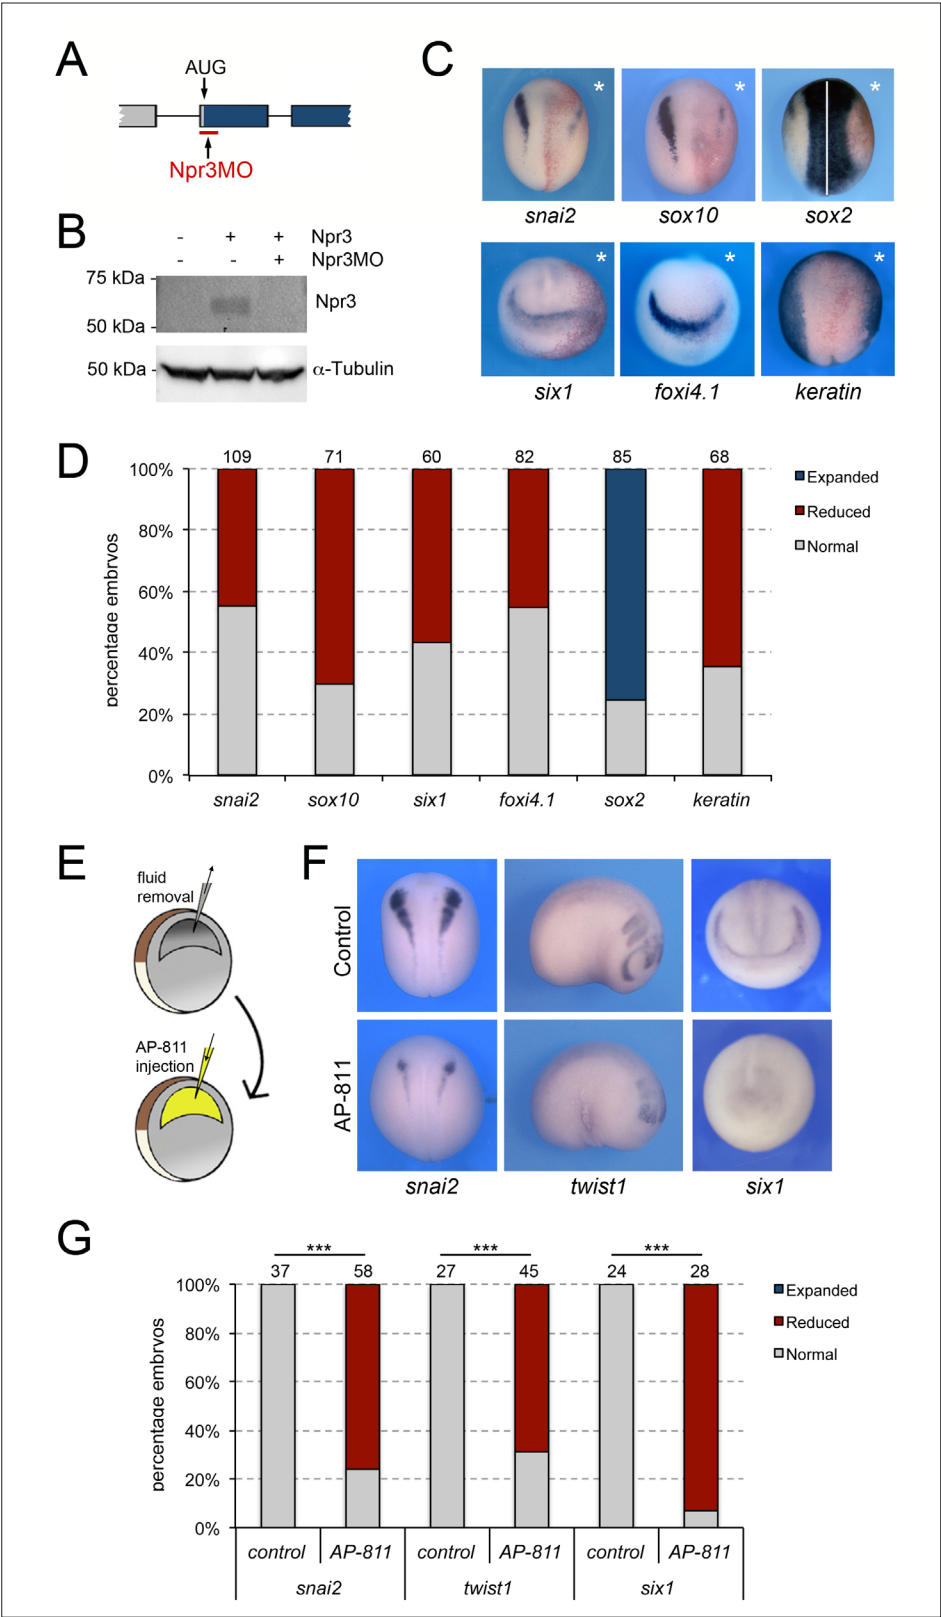

**Figure 2.** Npr3 is required for both NC and CP development. (A) Schematic representation of the *npr3* gene structure showing the target site of Npr3 translation blocking morpholino (Npr3MO; red). (B) Western blot analysis of protein lysates from control embryos and embryos injected with *npr3* mRNA (1 ng) alone or in combination with Npr3MO, using an anti-Npr3 antibody.  $\alpha$ -Tubulin is shown as a loading control. (C) Phenotype of Npr3MO (30 ng)

Figure 2 continued on next page

## Figure 2 continued

injected embryos. Npr3 knockdown differentially affect the expression of *snai2*, *sox10*, *six1*, *foxi4.1*, *sox2* and *keratin*. The asterisks (\*) mark the injected side, also visualized by the lineage tracer Red-gal. Dorsal views, anterior to top, except for *six1* and *foxi4.1*, which show anterior views, dorsal to top. **(D)** Frequency of the phenotypes. The number of embryos analyzed for each condition is indicated at the top of each bar. **(E)** Experimental design for the microinjection of Npr3 antagonist, AP-811, in the blastocoel cavity of blastula stage embryos. **(F)** The expression of *snai2*, *twist1* and *six1* is reduced in AP-811-treated embryos. Dorsal views, anterior to top (*snai2*). Lateral views, anterior to right (*twist1*). Anterior views, dorsal to top (*six1*). **(G)** Frequency of the phenotypes. The number of embryos analyzed is indicated at the top of each bar. \*\*\* $p < 0.0005$ ,  $\chi^2$  test.

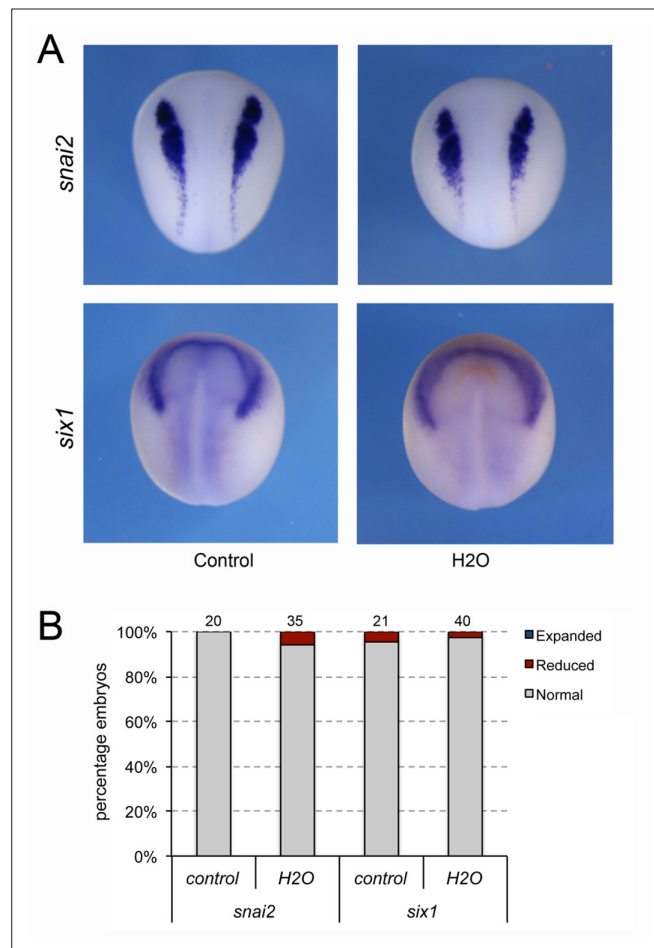

**Figure 2—figure supplement 1.** Manipulation of the blastocoele fluid does not affect *snai2* and *six1* expression. (A) The expression of *snai2* and *six1* is unaffected in embryos in which the blastocoele fluid was replaced by 100–120 nl of water at NF stage 9. Dorsal views, anterior to top. (B) Frequency of the phenotypes. The number of embryos analyzed is indicated at the top of each bar.

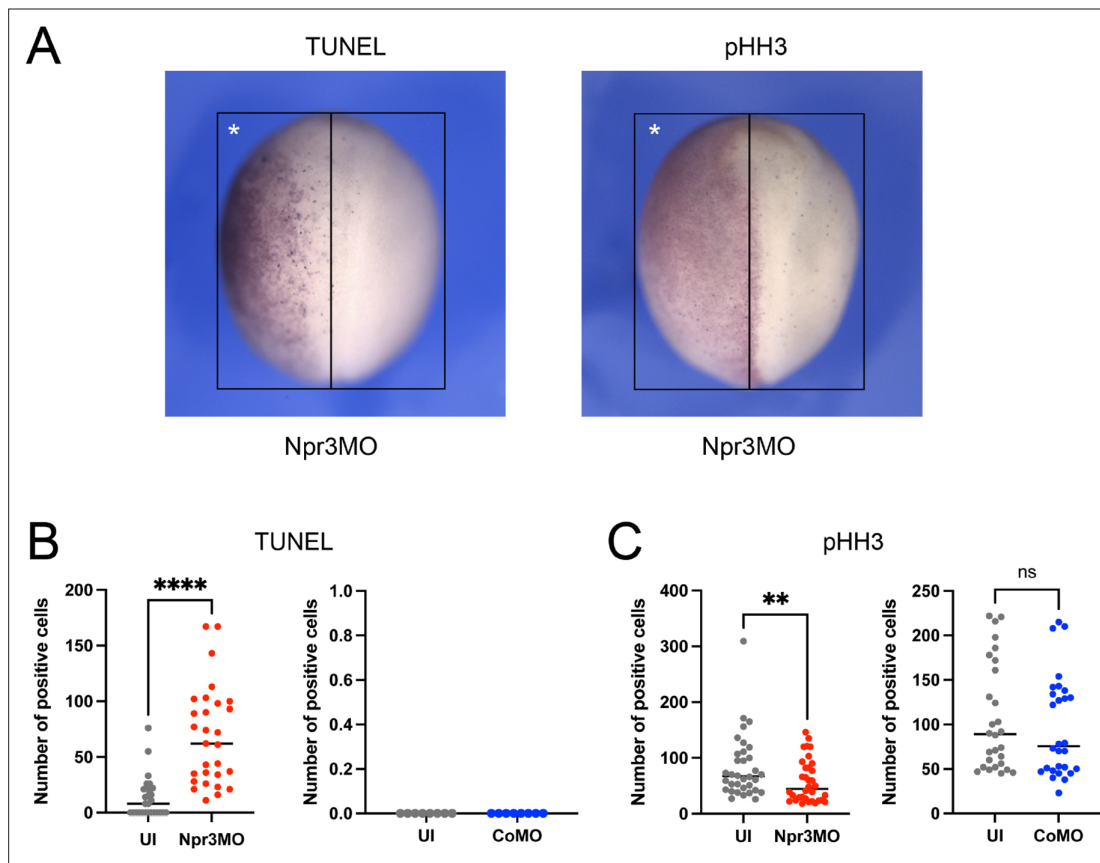

**Figure 2—figure supplement 2.** Npr3-depletion affects the rate of cell death or proliferation in the dorsal ectoderm. **(A)** Whole-mount TUNEL (left panel) and pHH3 (right panel) staining of stage 15 embryos injected with Npr3MO on the left side (asterisk). Dorsal views, anterior to top. The black boxes outline the area of the dorsal ectoderm in which TUNEL- and pHH3-positive cells were quantified for each half of the embryo. **(B–C)** Quantification of the number of TUNEL-positive **(B)** and pHH3-positive **(C)** cells in the dorsal ectoderm of CoMO- or Npr3MO-injected embryos comparing injected vs. uninjected sides (UI). Combined data from three biological replicates are shown. Each dot represents one embryo. p- values were calculated using paired t-test, \*\*  $p < 0.0095$ , \*\*\*\*  $p < 0.0001$ ; ns: not significant. Note: We observed variability in the number of TUNEL-positive cells at the uninjected side. In their original report describing the dynamic of programmed cell death during *Xenopus* development, **Hensey and Gautier, 1998** also reported considerable variation in the degree of TUNEL staining and patterns between embryos, including left-right asymmetries. The authors speculated that the presence of a fraction of TUNEL-negative embryos during gastrulation and neurulation might reflect the rapid clearance of dead cells from the embryo.

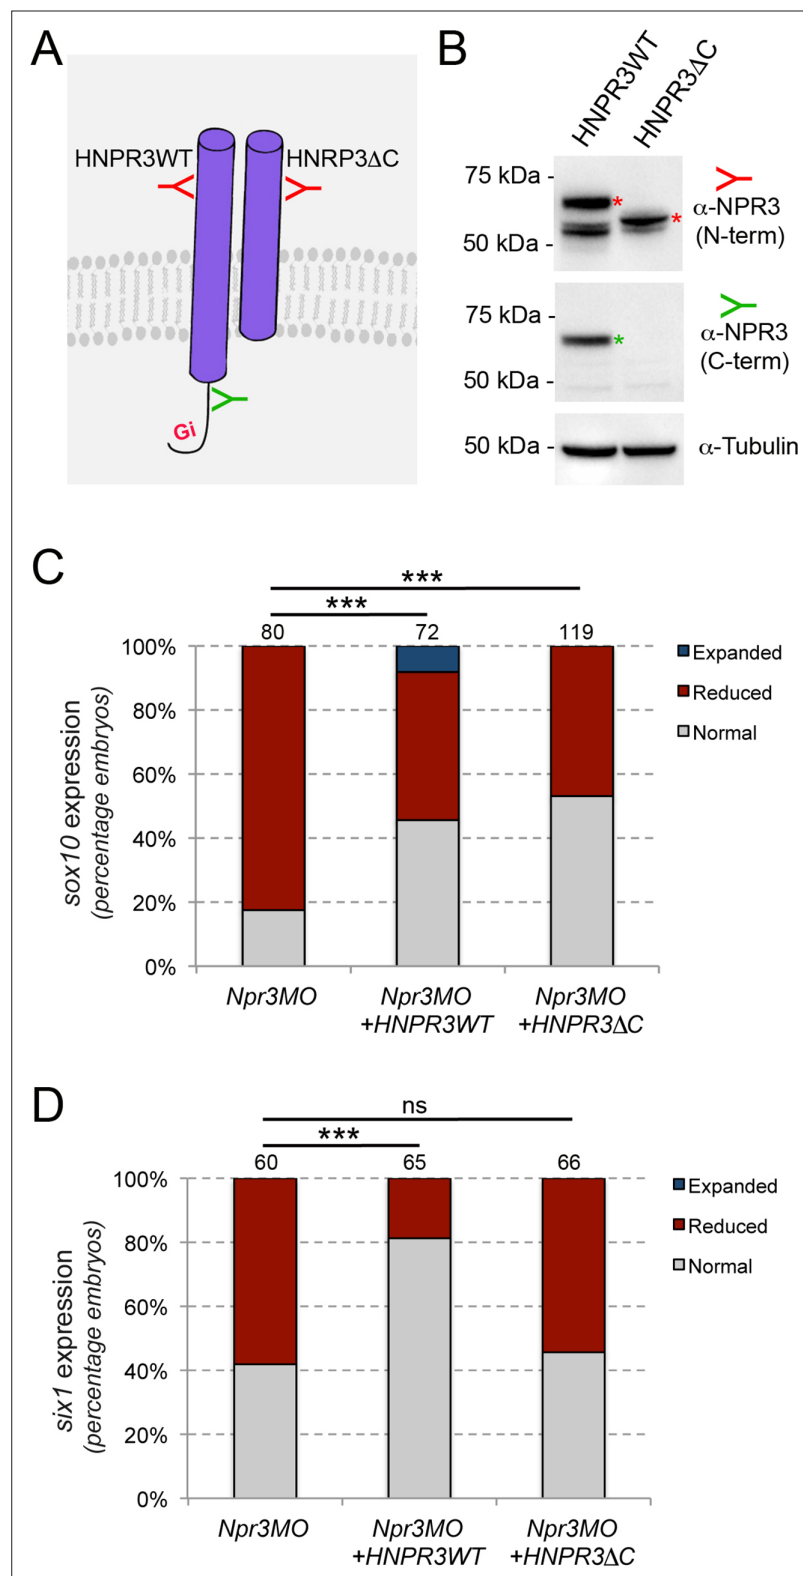

**Figure 3.** Npr3 regulates NC and CP fate through different mechanisms. **(A)** Two expression constructs were generated, a wild-type human NPR3 (HNPR3WT) and a truncated version of HNPR3 lacking the C-terminal Gi activator sequence (HNPR3ΔC). **(B)** Validation of the two constructs. Embryos injected with *HNPR3WT* or *HNPR3ΔC* mRNA were analyzed by Western blot using antibodies directed against the C-terminal (ProSci  $\Psi$ , Cat#42-909; green) or N-terminal (Santa Cruz Biotechnology, Cat#sc-515449; red) domains of NPR3.  $\alpha$ -Tubulin is

Figure 3 continued on next page

*Figure 3 continued*

shown as a loading control. The second band in the HNPR3WT lane may represent a cleaved version of HNPR3 lacking the cytoplasmic tail (not recognized by anti-NPR3 C-term), or alternatively a secreted version of NPR3 lacking the transmembrane domain. **(C)** HNPR3WT and truncated HNRP3 $\Delta$ C are equally efficient at rescuing *sox10* expression in *Npr3*-depleted embryos. **(D)** In contrast, only HNPR3WT is capable of restoring *six1* expression in *Npr3*-depleted embryos. **(C,D)** Phenotypes quantification is as described in **Figure 2**. The number of embryos analyzed is indicated at the top of each bar. \*\*\* $p < 0.0005$ ,  $\chi^2$  test. ns, not significant.

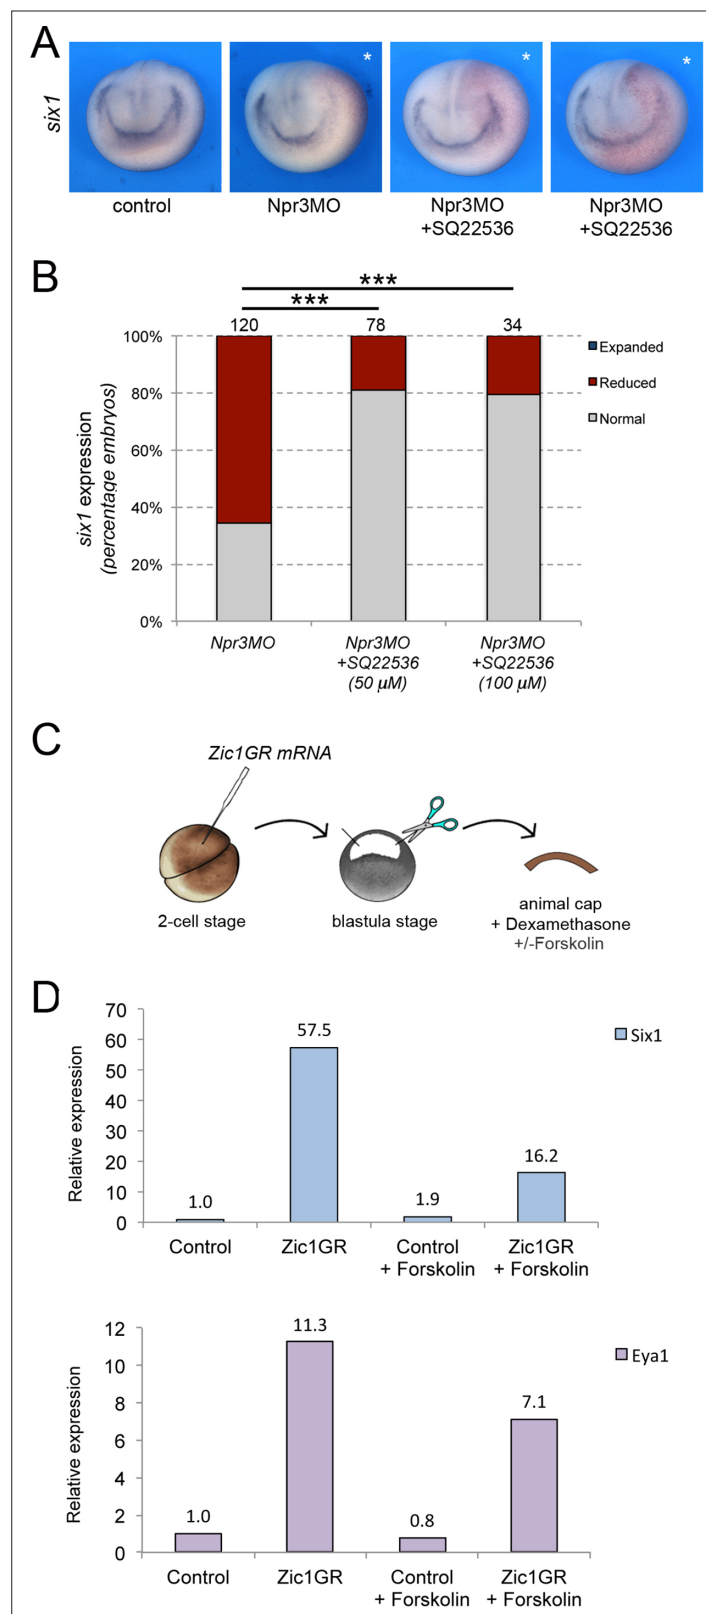

**Figure 4.** Npr3 requires adenylyl cyclase inhibition to promote CP fate. **(A)** Inhibition of adenylyl cyclase by treatment with SQ22536 restores *six1* expression in Npr3-depleted (Npr3MO) embryos. Two representative embryos are shown to illustrate the range of phenotypes. The asterisks (\*) mark the injected side, also visualized by the lineage tracer Red-gal. Anterior views, dorsal to top. **(B)** Frequency of the phenotypes. The number of

Figure 4 continued on next page



*Figure 4 continued*

embryos analyzed is indicated at the top of each bar. \*\*\* $p < 0.0005$ ,  $\chi^2$  test. **(C)** Experimental design to test the effect of adenylyl cyclase activation by Forskolin on the CP-inducing activity of Zic1. **(D)** qRT-PCR analysis of *six1* and *eya1* expression in animal cap explants injected with Zic1GR mRNA and cultured in the presence of dexamethasone +/- forskolin (50  $\mu$ M). Values are normalized to *odc*. A representative experiment is shown. Two additional biological replicates are shown in **Figure 2**.

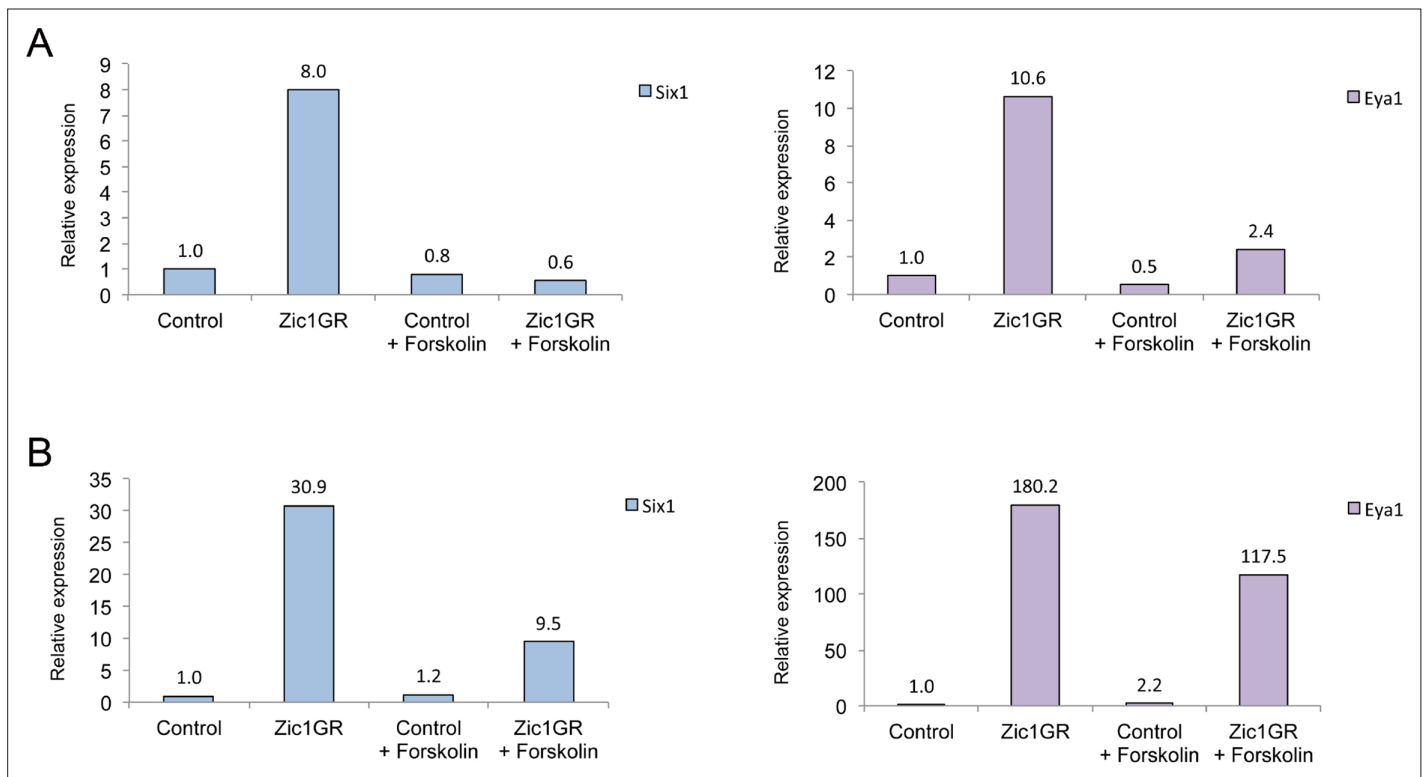

**Figure 4—figure supplement 1.** Forskolin treatment interferes with *six1* and *eya1* induction by Zic1GR. qRT-PCR analysis of *six1* and *eya1* expression in Zic1GR-injected animal caps untreated or treated with 50  $\mu$ M Forskolin, from two biological replicates (**A and B**). Expression levels are normalized to *odc*.

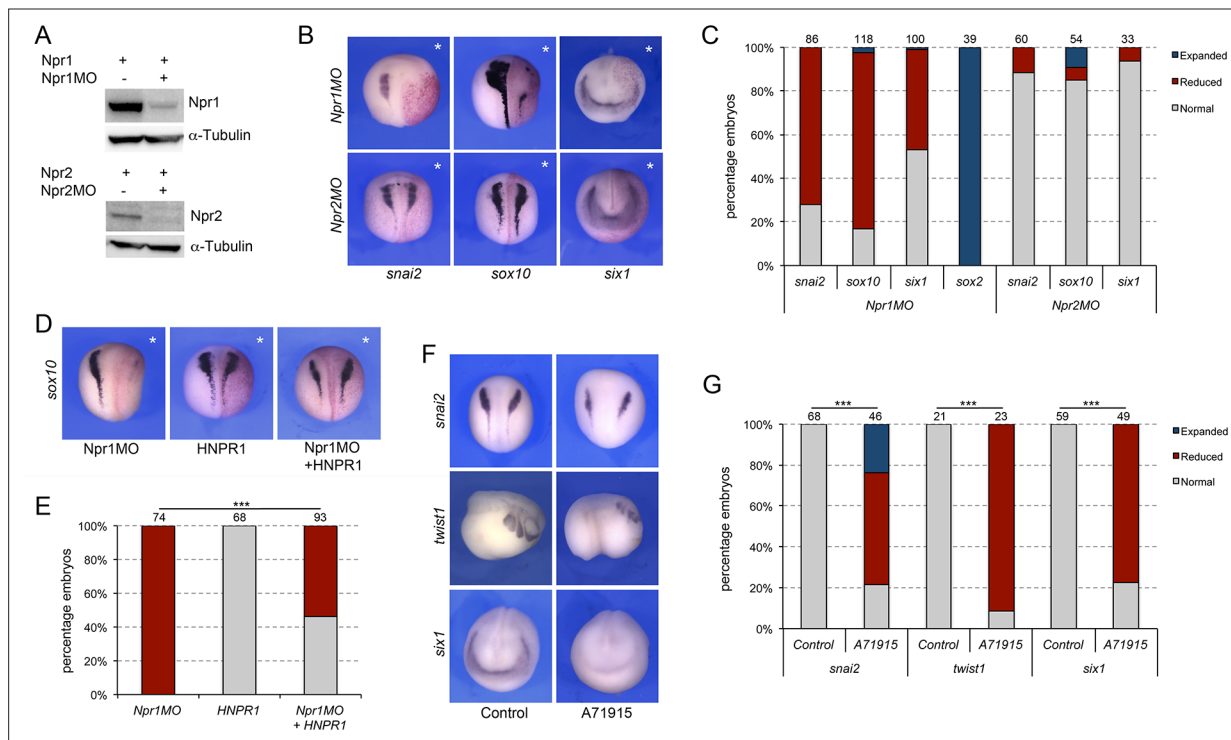

**Figure 5.** Signaling through Npr1 regulates NC and CP formation. (A) Western blot analysis of protein lysates from control embryos and embryos injected with *npr1* or *npr2* mRNA (1 ng) alone or in combination with the corresponding translation blocking MO, Npr1MO and Npr2MO, respectively.  $\alpha$ -Tubulin is shown as a loading control. (B) ISH for *snai2*, *sox10* and *six1* expression in Npr1MO- and Npr2MO-injected embryos. The asterisks (\*) mark the injected side, also visualized by the lineage tracer Red-gal. Dorsal views, anterior to top, except for *six1*, which shows anterior views, dorsal to top. (C) Frequency of the phenotypes. The number of embryos analyzed for each condition is indicated at the top of each bar. (D) Rescue of Npr1 knockdown phenotype (*sox10*) by expression of human NPR1 (HNPR1). The asterisks (\*) mark the injected side, also visualized by the lineage tracer Red-gal. (E) Frequency of the phenotypes. The number of embryos analyzed is indicated at the top of each bar. \*\*\* $p < 0.0005$ ,  $\chi^2$  test. (F) The expression of *snai2*, *twist1*, and *six1* is reduced upon treatment with A71915, a potent Npr1 antagonist. Dorsal views, anterior to top (*snai2*). Lateral views, anterior to right (*twist1*). Anterior views, dorsal to top (*six1*). (G) Frequency of the phenotypes. The number of embryos analyzed is indicated at the top of each bar. \*\*\* $p < 0.0005$ ,  $\chi^2$  test.

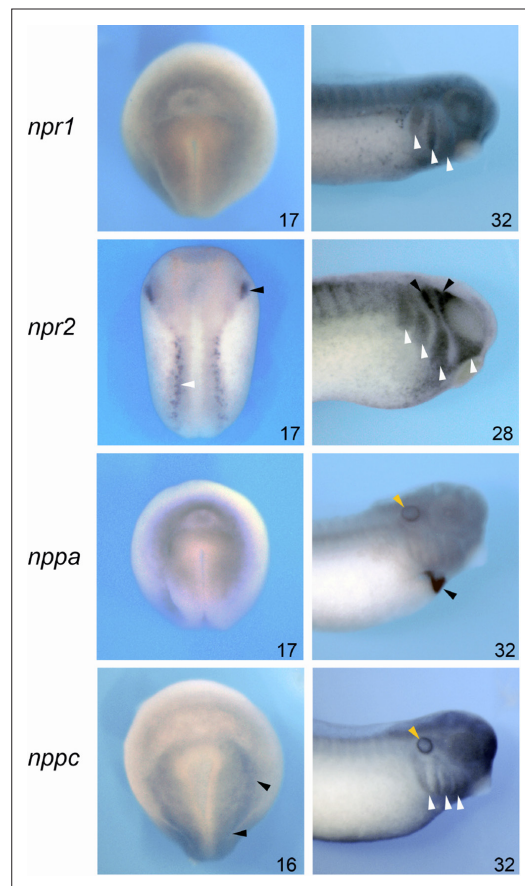

**Figure 5—figure supplement 1.** Spatial expression of *npr1*, *npr2*, *nppa* and *nppc* by whole-mount ISH. Spatial expression of *npr1*, *npr2*, *nppa*, and *nppc* by whole-mount ISH at neurula (NF stage 15/16) and tailbud (NF stage 28/32) stages. The embryonic stages are indicated in the lower right corner of each panel. *npr1* is broadly expressed at the neurula stage, and becomes enriched dorsally and anteriorly at the tailbud stage. In the head region it is detected in the branchial arches (white arrowheads). At neurula stage, *npr2* is detected in the trigeminal placode (black arrowhead) and Rohon-Beard neurons (white arrowhead). Later in development, *npr2* is detected in the trigeminal/profundal ganglion complex (black arrowhead) and in the branchial arches (white arrowheads). *nppa* appears to be diffusely expressed at neurula stage, and at tailbud stage *nppa* is exclusively restricted to the developing heart (black arrowhead) and otic vesicle (yellow arrowhead). At neurula stage, *nppc* is enriched at the neural plate border (black arrowheads), and at tailbud stage it is enriched in the prospective epibranchial placodes (white arrowheads) and otic vesicle (yellow arrowhead). Left column, dorsal views anterior to top. Right column, lateral views, anterior to right dorsal to top.

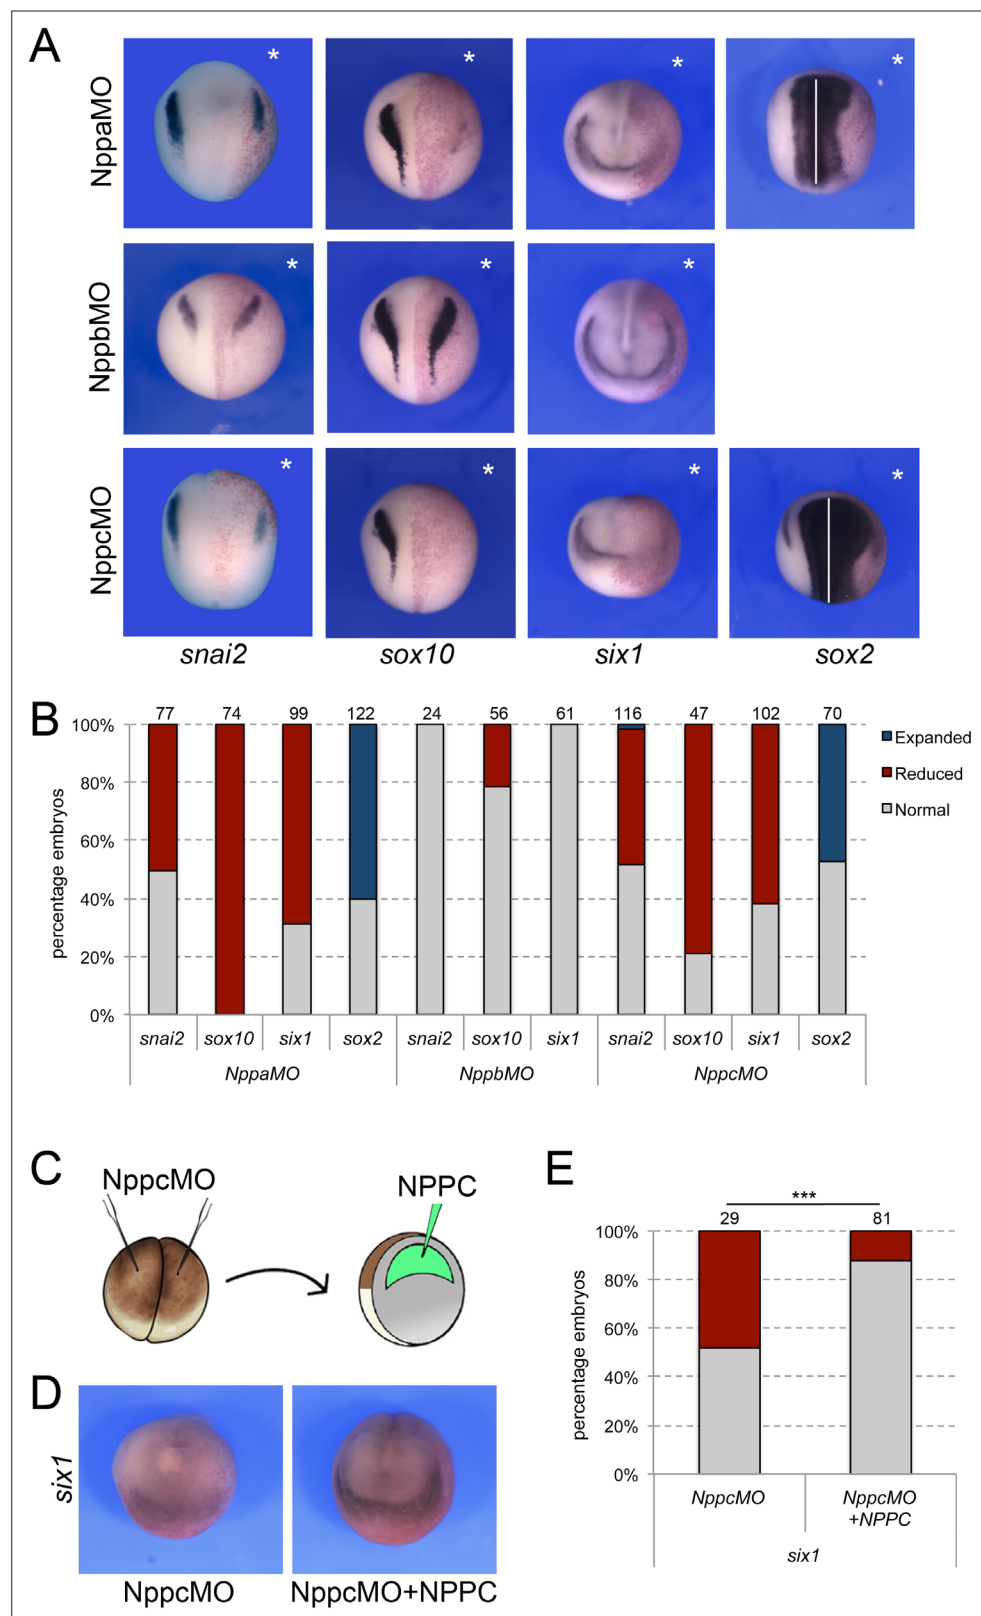

**Figure 6.** Natriuretic peptides activity during NC and CP formation. **(A)** ISH for *snai2*, *sox10*, *six1* and *sox2* expression in NppaMO-, NppbMO-, and NppcMO-injected embryos. The asterisks (\*) mark the injected side, also visualize by the lineage tracer Red-gal. Dorsal views, anterior to top, except for *six1*, which shows anterior views, dorsal to top. **(B)** Frequency of the phenotypes. The number of embryos analyzed for each condition is

Figure 6 continued on next page

*Figure 6 continued*

indicated at the top of each bar. **(C)** To rescue the phenotype of *Nppc* morphant embryos, recombinant NPPC was microinjected in the blastocoel cavity of *Nppc*-depleted embryos. **(D)** NPPC can restore *six1* expression in *Nppc*MO-injected embryos. Anterior views, dorsal to top. **(E)** Frequency of the phenotypes. The number of embryos analyzed is indicated at the top of each bar. \*\*\* $p < 0.0005$ ,  $\chi^2$  test.
