# Supplementary material for: Npr3 regulates neural crest and cranial placode progenitors formation through its dual function as clearance and signaling receptor
Source: eLife journal article supplement (doi:10.7554/elife.84036), 2023-05-10
Supplement: supp [file elife-84036-supp-v1.zip]

**Figure 5-figure supplement 1**

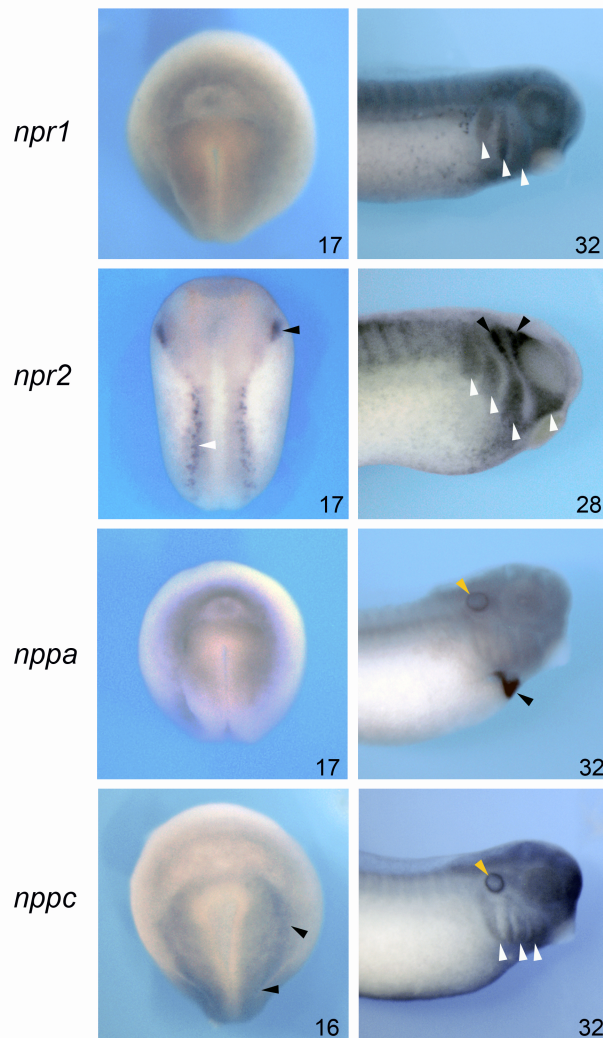

**Spatial expression of *npr1*, *npr2*, *nppa* and *nppc* by whole-mount ISH.** Spatial expression of *npr1*, *npr2*, *nppa* and *nppc* by whole-mount ISH at neurula (NF stage 15/16) and tailbud (NF stage 28/32) stages. The embryonic stages are indicated in the lower right corner of each panel. *npr1* is broadly expressed at the neurula stage, and becomes enriched dorsally and anteriorly at the tailbud stage. In the head region it is detected in the branchial arches (white arrowheads). At neurula stage, *npr2* is detected in the trigeminal placode (black arrowhead) and Rohon-Beard neurons (white arrowhead). Later in development, *npr2* is detected in the trigeminal/profundal ganglion complex (black arrowhead) and in the branchial arches (white arrowheads). *nppa* appears to be diffusely expressed at neurula stage, and at tailbud stage *nppa* is exclusively restricted to the developing heart (black arrowhead) and otic vesicle (yellow arrowhead). At neurula stage, *nppc* is enriched at the neural plate border (black arrowheads), and at tailbud stage it is enriched in the prospective epibranchial placodes (white arrowheads) and otic vesicle (yellow arrowhead). Left column, dorsal views anterior to top. Right column, lateral views, anterior to right dorsal to top.
