# Supplementary material for: Npr3 regulates neural crest and cranial placode progenitors formation through its dual function as clearance and signaling receptor
Source: eLife journal article supplement (doi:10.7554/elife.84036), 2023-05-10
Supplement: supp [file elife-84036-supp-v1.zip]

**Figure 1-figure supplement 1:**

**A**

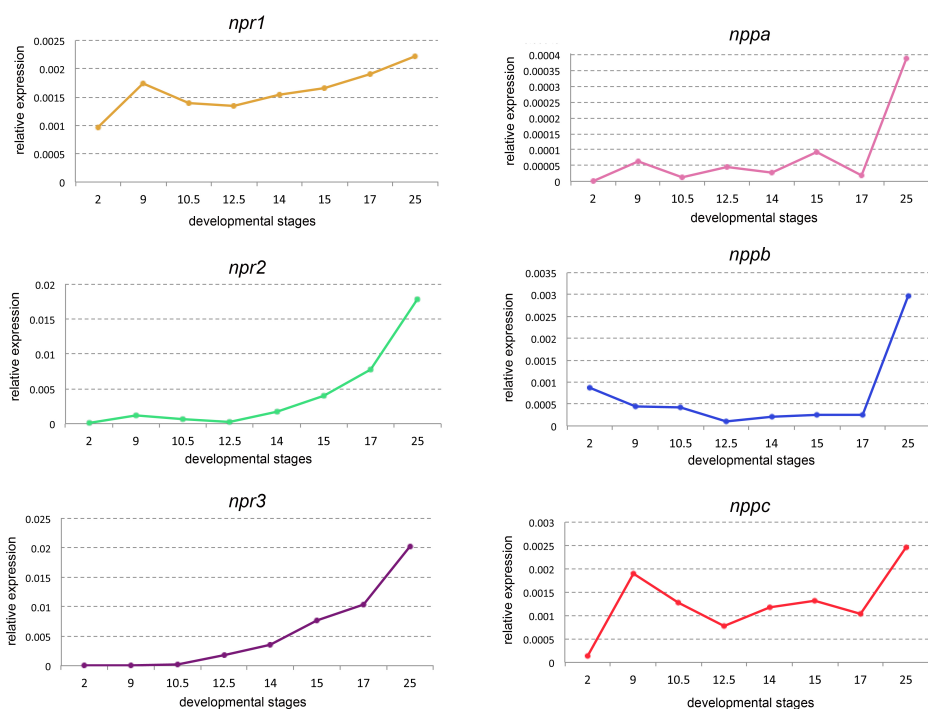

**B**

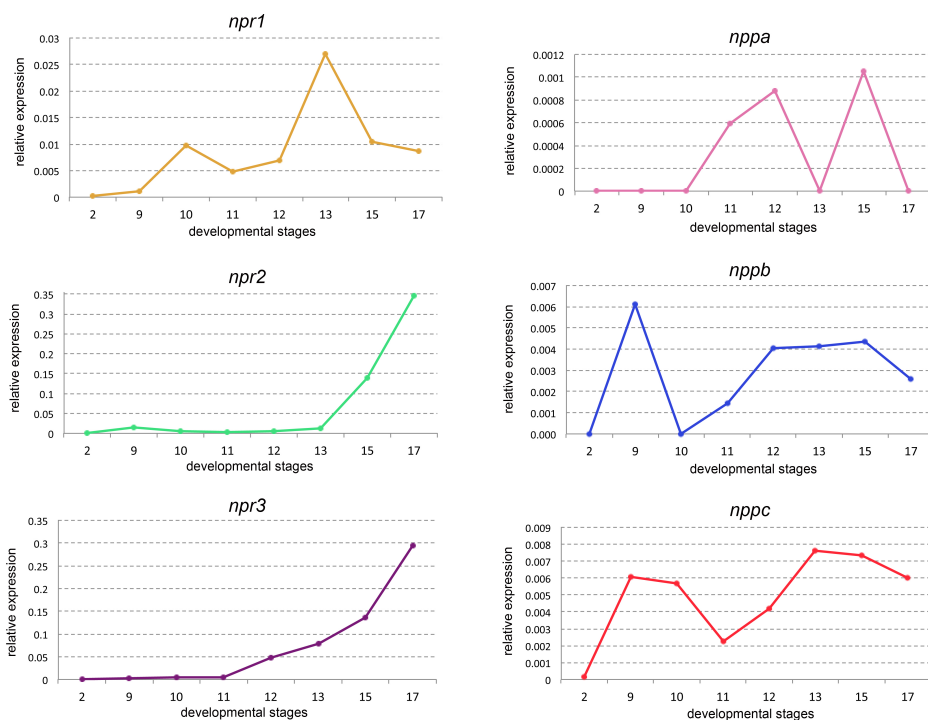

**Developmental RT-PCR of natriuretic peptide signaling pathway components.** Developmental qRT-PCR expression profile of *npr1*, *npr2*, *npr3*, *nppa*, *nppb* and *nppc* in two biological replicates (A and B) of WT *Xenopus* embryos. NF stages are indicated on x-axis, values are normalized to *odc*.
