# Supplementary material for: Npr3 regulates neural crest and cranial placode progenitors formation through its dual function as clearance and signaling receptor
Source: eLife journal article supplement (doi:10.7554/elife.84036), 2023-05-10
Supplement: supp [file elife-84036-supp-v1.zip]

**Figure 2-figure supplement 1**

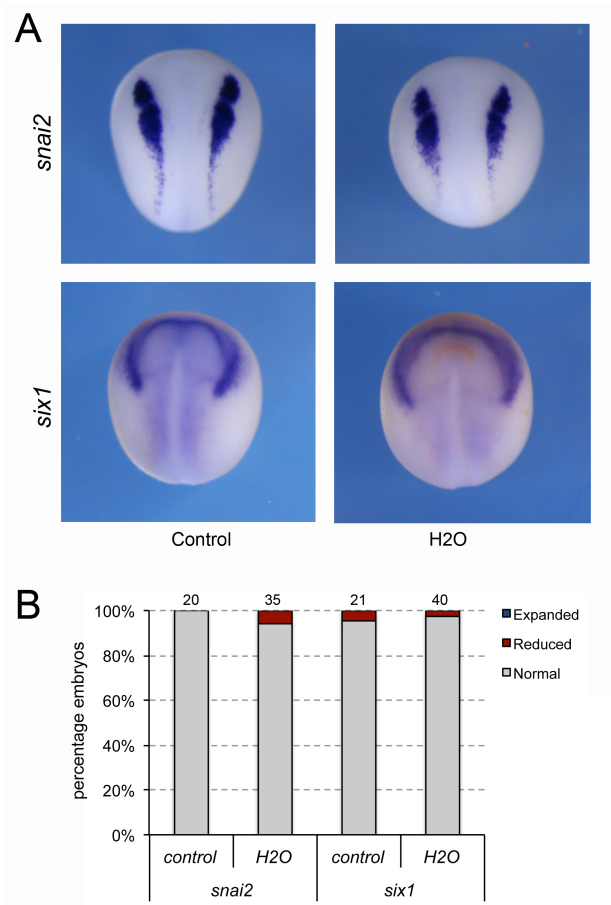

**Manipulation of the blastocoel fluid does not affect *snai2* and *six1* expression.** (A) The expression of *snai2* and *six1* is unaffected in embryos in which the blastocoel fluid was replaced by 100-120 nl of water at NF stage 9. Dorsal views, anterior to top. (B) Frequency of the phenotypes. The number of embryos analyzed is indicated at the top of each bar.
