# Supplementary material for: Npr3 regulates neural crest and cranial placode progenitors formation through its dual function as clearance and signaling receptor
Source: eLife journal article supplement (doi:10.7554/elife.84036), 2023-05-10
Supplement: supp [file elife-84036-supp-v1.zip]

**Figure 4-figure supplement 1**

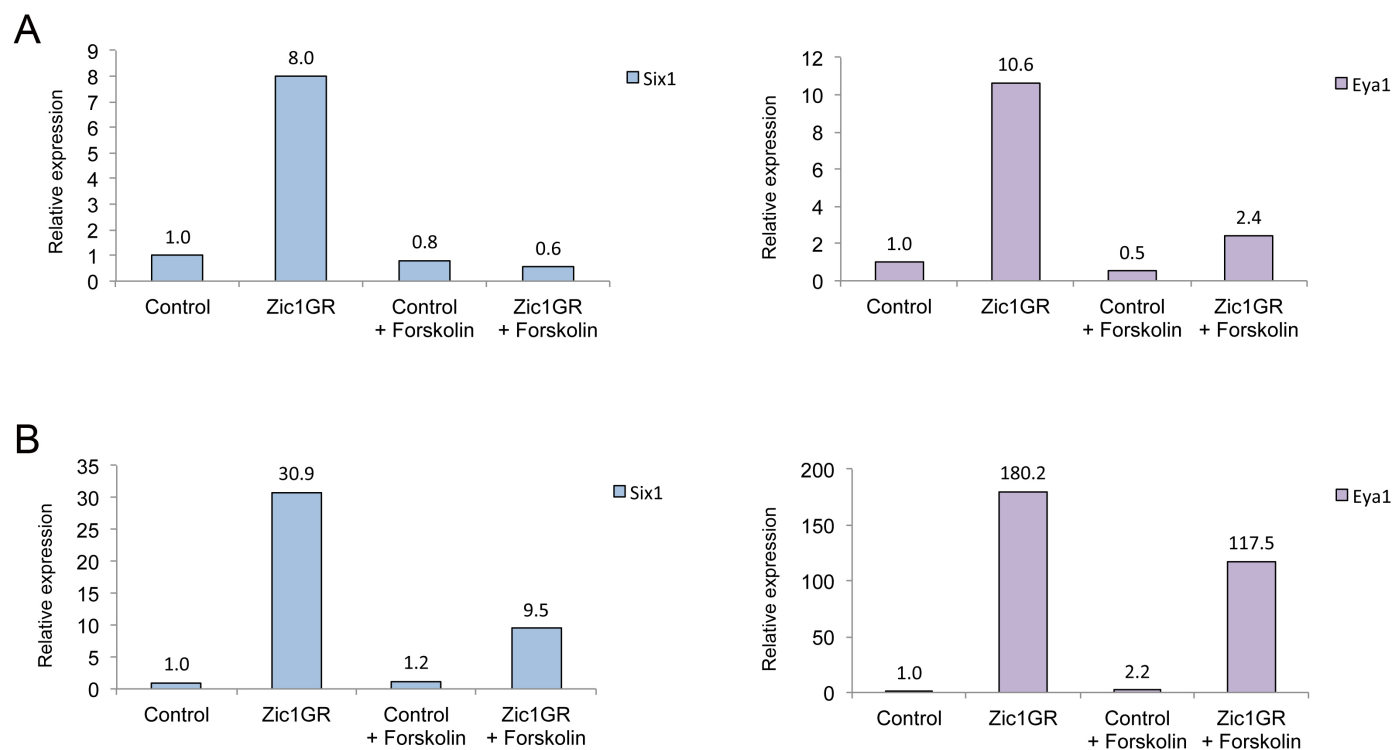

**Forskolin treatment interferes with *six1* and *eya1* induction by Zic1GR.** qRT-PCR analysis of *six1* and *eya1* expression in Zic1GR-injected animal caps untreated or treated with 50 mM Forskolin, from two biological replicates (A and B). Expression levels are normalized to *odc*.
