# Supplementary material for: Npr3 regulates neural crest and cranial placode progenitors formation through its dual function as clearance and signaling receptor
Source: eLife journal article supplement (doi:10.7554/elife.84036), 2023-05-10
Supplement: supp [file elife_poa_e84036_Figure_2_source_data_2.docx]

**Figure 2-source data 2**

**
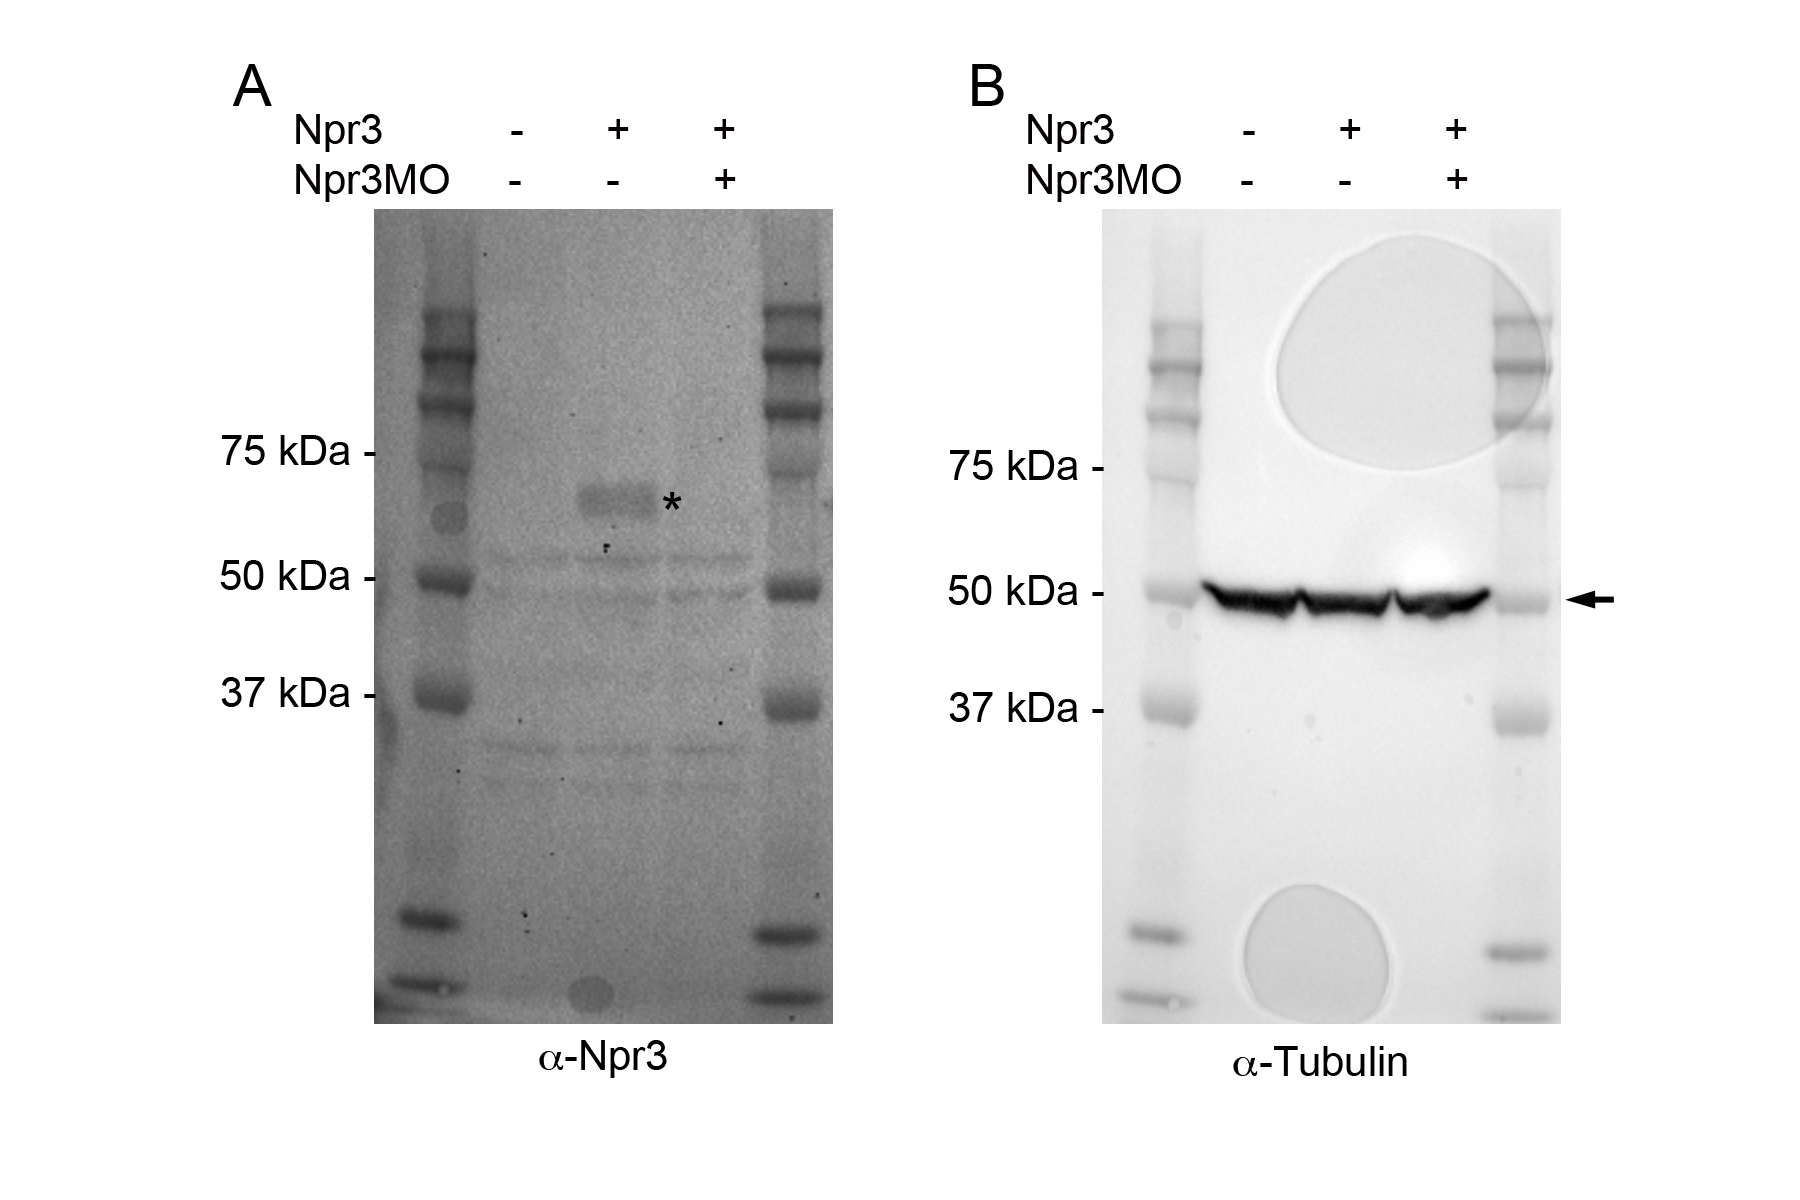
**

Full Western blot of the cropped versions presented in Fig. 2B**.**

**(A)** Npr3 protein (black star) recognized by anti-NPR3 antibody is indicated. **(B)** Tubulin (black arrow) is shown as a loading control.
