# Supplementary material for: Npr3 regulates neural crest and cranial placode progenitors formation through its dual function as clearance and signaling receptor
Source: eLife journal article supplement (doi:10.7554/elife.84036), 2023-05-10
Supplement: supp [file elife_poa_e84036_Figure_3_source_data_1.docx]

**Figure 3-source data 1**

**
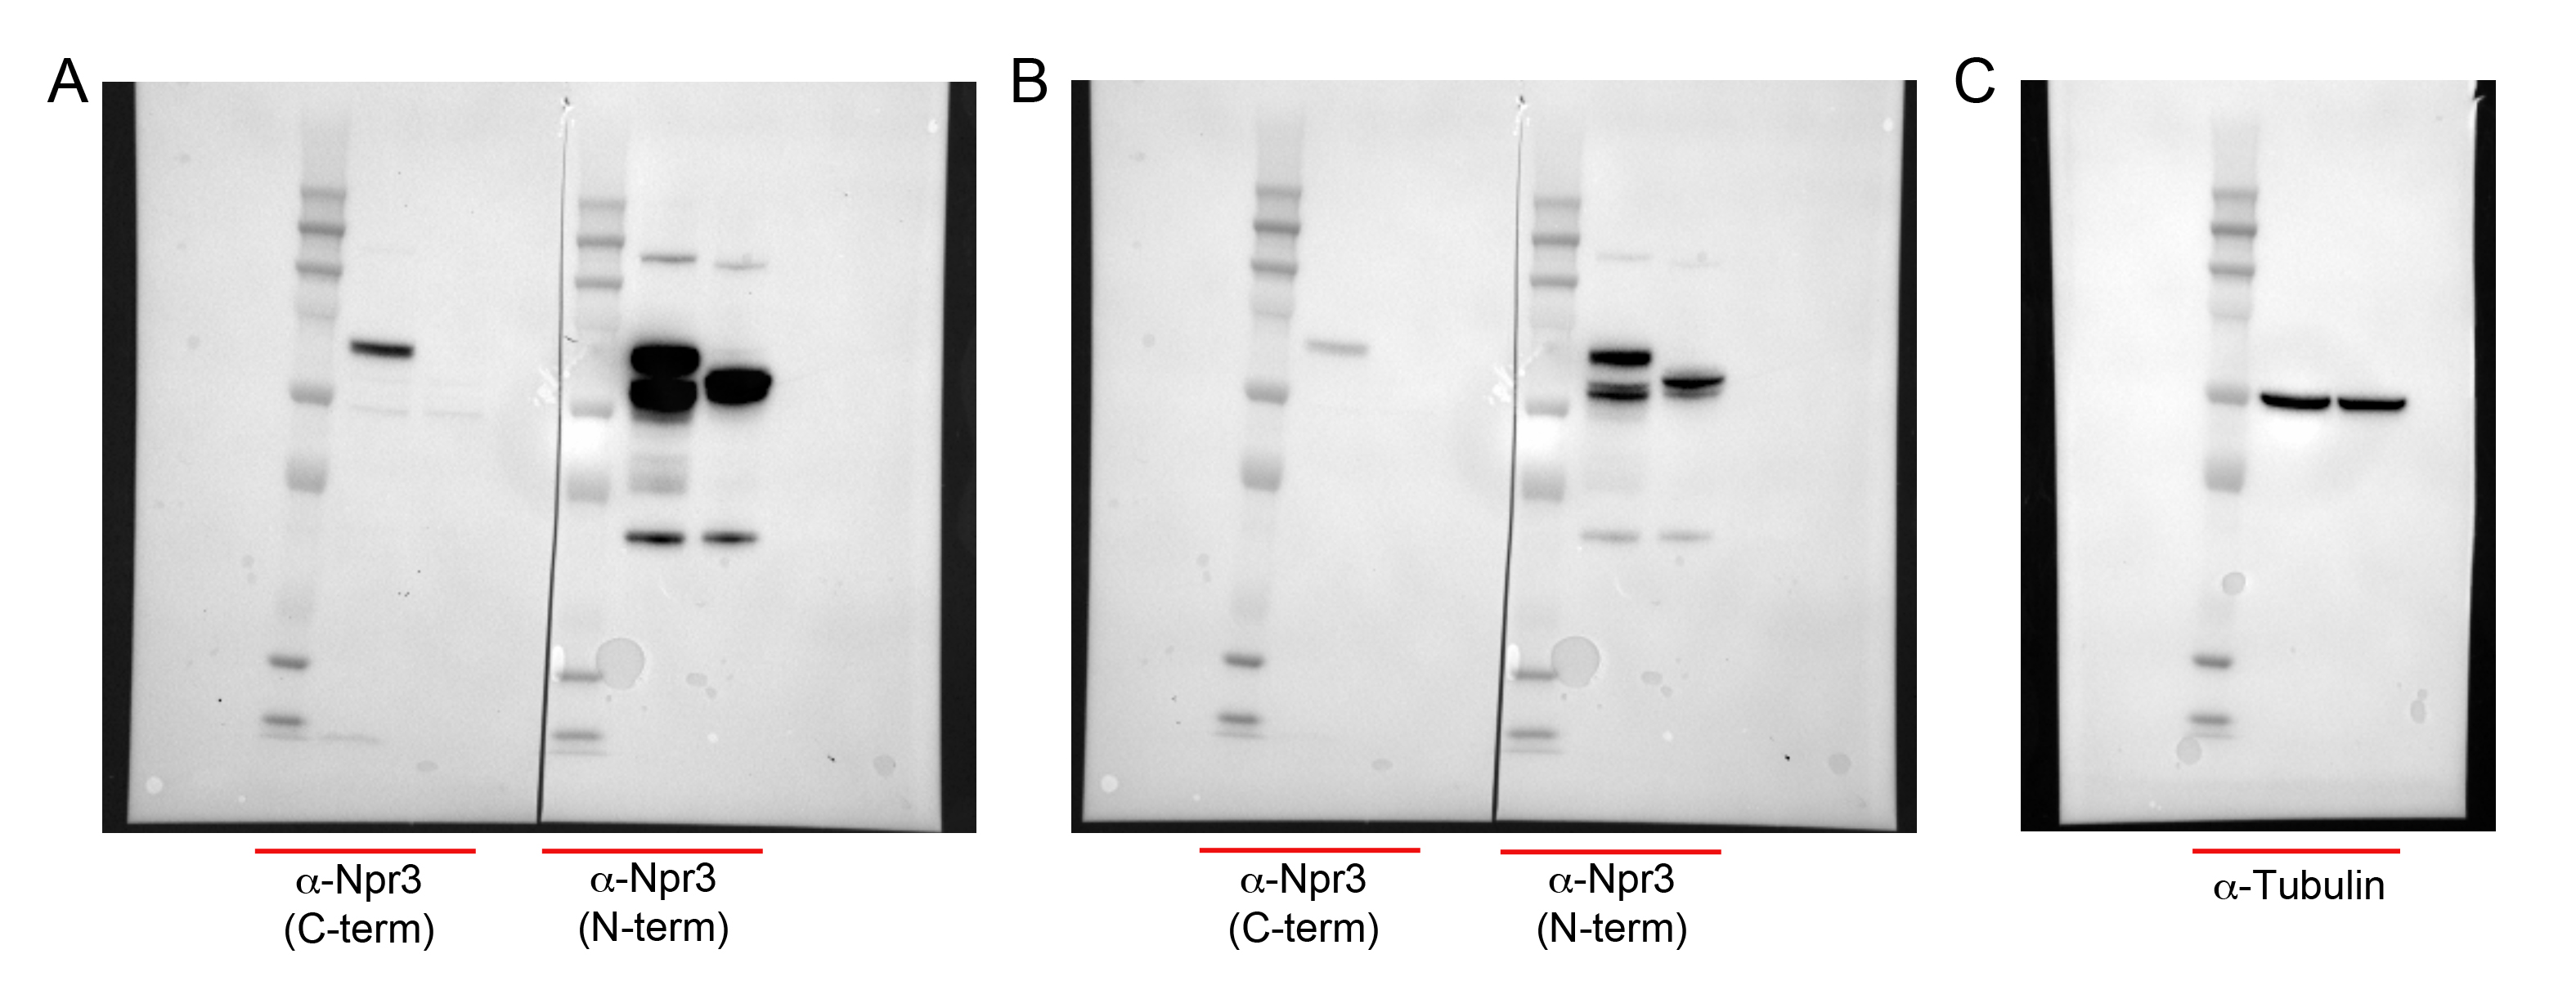
**

Original files of the full raw unedited Western blots presented in Fig. 3B**.**

**(A-B)** Western blots using C-term and N-term anti-NPR3 antibody revealed after long **(A)** or short **(B)** exposure. **(C)** Western blot using anti-Tubulin antibody. The relevant portion of the Western blot in each panel is underlined in red.
