# Supplementary material for: Npr3 regulates neural crest and cranial placode progenitors formation through its dual function as clearance and signaling receptor
Source: eLife journal article supplement (doi:10.7554/elife.84036), 2023-05-10
Supplement: supp [file elife_poa_e84036_Figure_3_source_data_2.docx]

**Figure 3-source data 2**

**
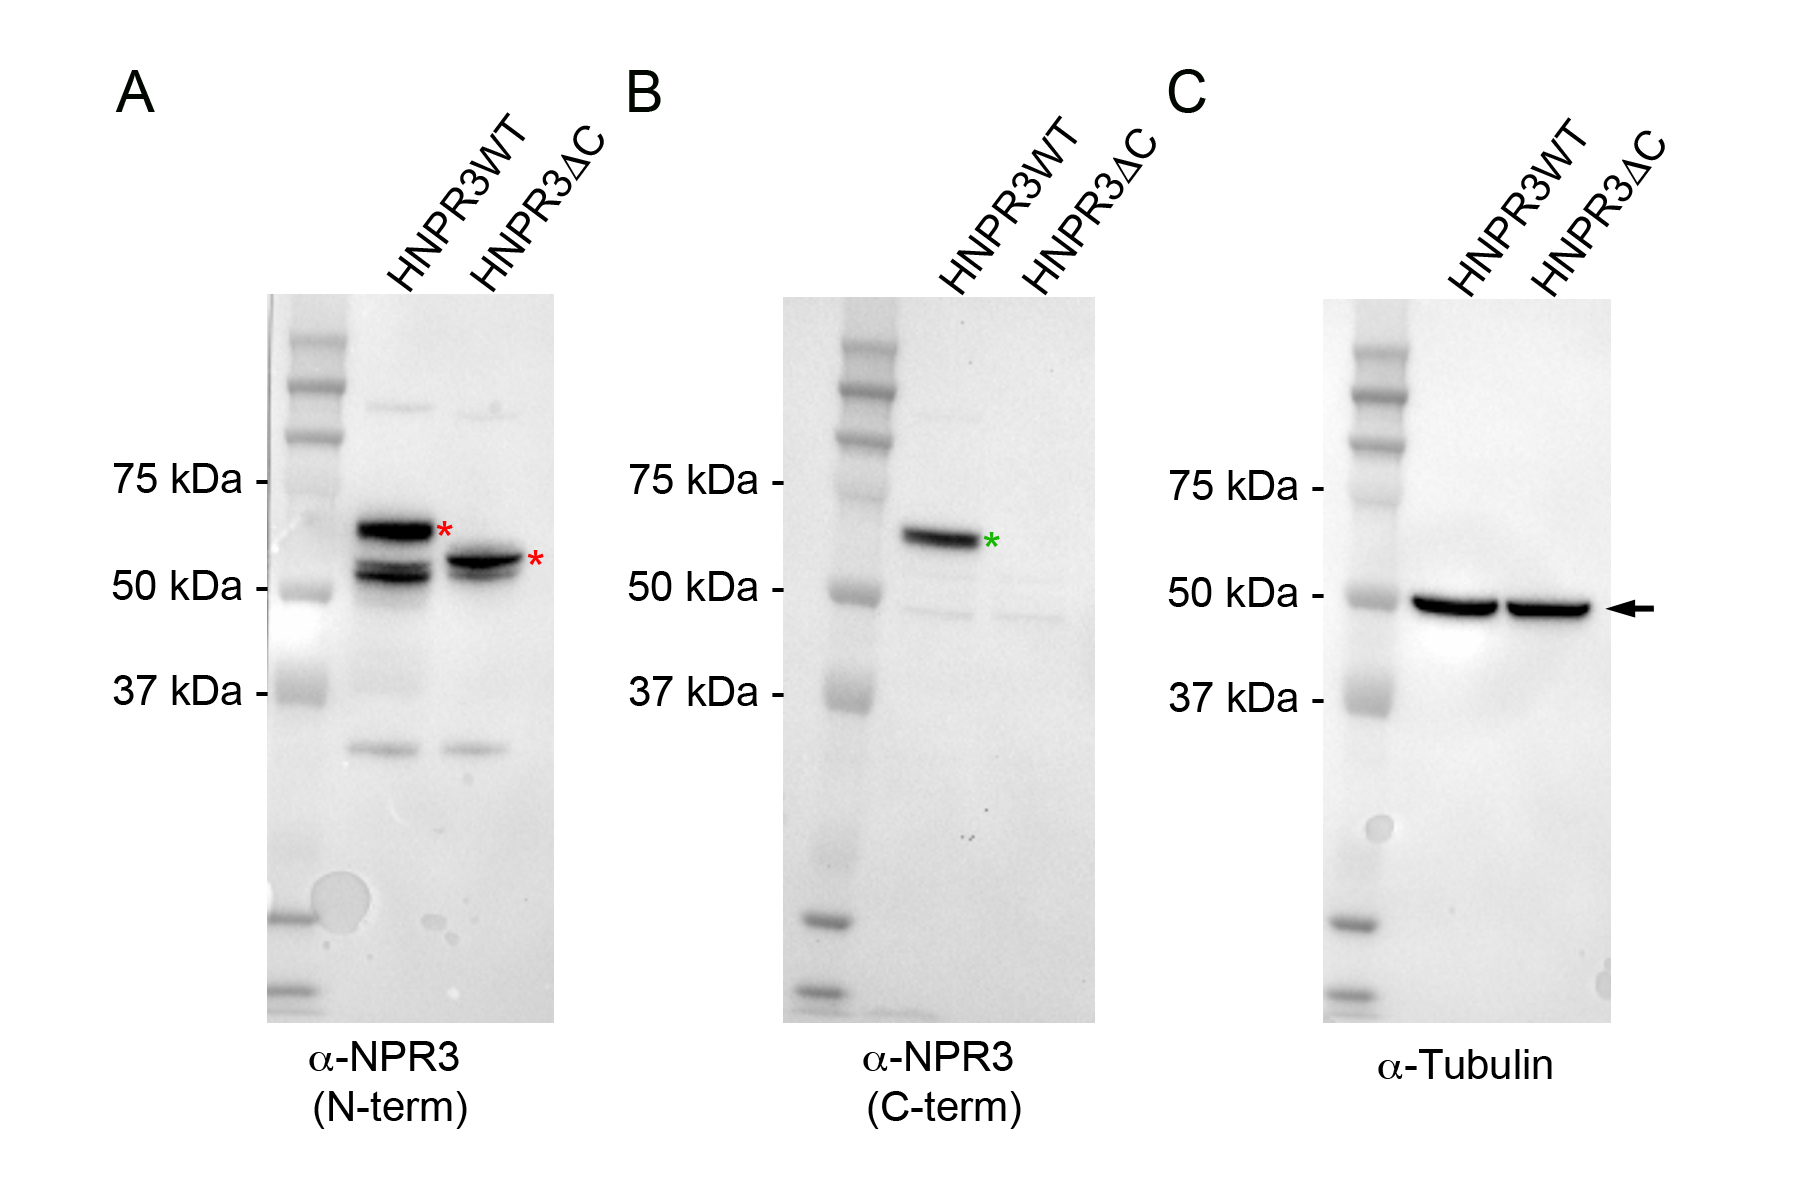
**

Full Western blot of the cropped versions presented in Fig. 3B**.**

**(A)** NPR3 protein (red star) recognized by a-NPR3(N-term) antibody, and **(B)** NPR3 protein (green star) recognized by a-NPR3(C-term) antibody are indicated. **(C)** Tubulin (black arrow) is shown as a loading control.
