# Supplementary material for: Npr3 regulates neural crest and cranial placode progenitors formation through its dual function as clearance and signaling receptor
Source: eLife journal article supplement (doi:10.7554/elife.84036), 2023-05-10
Supplement: supp [file elife_poa_e84036_Figure_5_source_data_1.docx]

**Figure 5-source data 1**

**
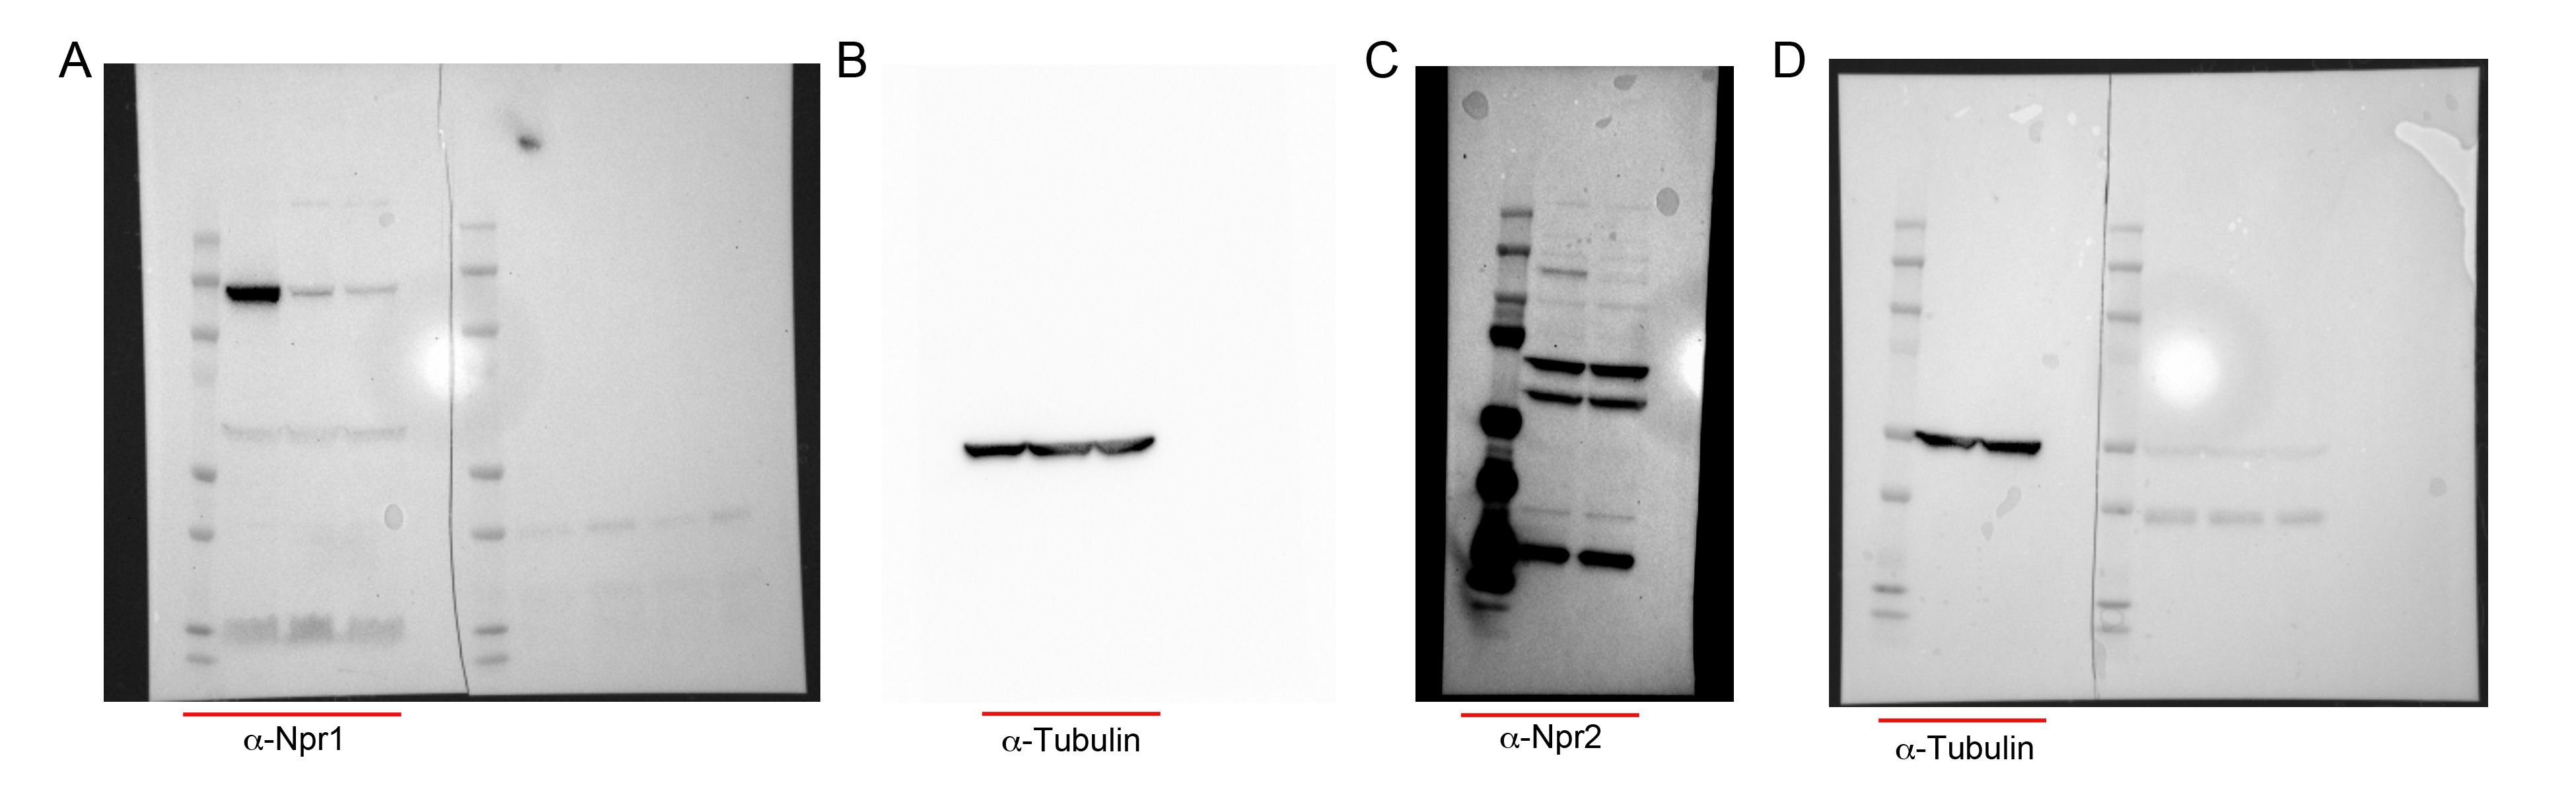
**

Original files of the full raw unedited Western blots presented in Fig. 5A**.**

**(A)** Western blot using anti-Npr1 antibody. **(B)** Corresponding Western blot using anti-Tubulin antibody. **(C)** Western blot using anti-Npr2 antibody **(D)** Corresponding Western blot using anti-Tubulin antibody. The relevant portion of the Western blot in each panel is underlined in red.
