# Supplementary material for: Npr3 regulates neural crest and cranial placode progenitors formation through its dual function as clearance and signaling receptor
Source: eLife journal article supplement (doi:10.7554/elife.84036), 2023-05-10
Supplement: supp [file elife_poa_e84036_Source_data_1.xlsx]

## Sheet: Pax-Zic (Fig 1)
	Normal	Reduced	Expanded	N
Pax3MO (40ng)	1	24		25
Zic1MO (40ng)	1	21	1	23
CoMO (40ng)	56	1		57
									Normal	Reduced	Expanded	N
Pax3MO (40ng)	2	33		35				CoMO	56	1		57
Zic1MO (40ng)		35		35				Zic1MO	1	56	1	58
								Pax3MO	3	57		60

## Sheet: Npr3MO (Fig 2+Fig 3)
NPR3MO (40-50 ng)											COMBINED EXPERIMENTS
		Normal	Reduced	Expanded	N
sox10		1	27		28	HG						Normal	Reduced	Expanded	N
		20	23		43	HG					snai2	60	49		109
											sox10	21	50		71
snai2		11	14		25	HG					six1	35	46		60
		29	11		40	HG					foxi4.1	45	37		82
		12	18		30	AD					sox2	21		64	85
		8	6		14	AD					keratin	24	44		68
sox2		5		23	28	AD
		7		22	29	HG
		9		19	28	AD
dmrta1		15	12		27	HG
six1		10	11		21	HG
		25	35		60	AD
foxi4.1		30	23		53	HG
		15	14		29	HG
krt12.4		5	15		20	HG
		13	15		28	AD
		6	14		20	AD
NPR3MO - Rescue - Combined
Rescue- Sox10						Rescue- Six1
		Normal	Reduced	Expanded				Normal	Reduced	Expanded
Npr3MO		14	66			Npr3MO		25	35
Npr3MO +HNPR3WT		33	33	6		Npr3MO +HNPR3WT		53	12
Npr3MO +HNPR3DC		63	56			Npr3MO +HNPR3DC		30	36
Rescue Sox10
2018-08-13		Expanded	Reduced	Normal
NPRCMO			32
HNPRC+NPRCMO			24	28
HPRCDC+NPRCMO			52	7
2018-07-20		Expanded	Reduced	Normal
NPRCMO			34	14
HNPRC+NPRCMO		6	9	5
HPRCDC+NPRCMO			4	56

## Sheet: AP811 (Fig 2)
AP811 - blastocoel injection
		Normal	Reduced	Expanded	N
snai2	AP811	14	44		58
	Control	37			37
twist1 (stage 23)	AP811	14	31		45
	Control	27			27						Normal	Reduced	Expanded	N
									snai2	control	37			37
										AP-811	14	44		58
six1	AP811		12		12				twist1	control	27			27
	Control	24								AP-811	14	31		45
									six1	control	24			24
										AP-811	2	26		28
											Normal	Reduced	Expanded	N
									snai2	control	20			20
										H2O	33	2		35
									six1	control	20	1		21
										H2O	39	1		40

## Sheet: SQ22536 (Fig 4)
	SQ22536
		Normal	Reduced	Expanded	N
	Npr3MO	41	79		120
	Npr3MO +SQ22536 (50 uM)	63	15		78
	Npr3MO +SQ22536 (100 uM)	27	7		34

## Sheet: Forskolin (Fig 4)
		2020-12-08		Six1	Eya1
			Control	1	1
			Zic1GR	8.00028	10.6431
			Control + Forskolin	0.811251	0.519944
			Zic1GR + Forskolin	0.557985	2.4162
		2021-01-11		Six1	Eya1
			Control	1	1
			Zic1GR	57.5168	11.2972
			Control + Forskolin	1.90544	0.765298
			Zic1GR + Forskolin	16.1706	7.11824
		2021-02-15		Six1	Eya1
			Control	1	1
			Zic1GR	30.867	180.208
			Control + Forskolin	1.23994	2.15688
			Zic1GR + Forskolin	9.46553	117.477

## Sheet: Npr1MO-Npr2MO (Fig 5)
NPR1MO (50/30 ng)								COMBINED
	Normal	Reduced	Expanded	N
snai2	16	22		38				NPR1MO	Normal	Reduced	Expanded
	5	15		20				snai2	24	62
	3	25		28				sox10	20	95	3
	24	62		86				six1	53	46	1
								foxg1	23	11
sox10	15	22	3	40
	5	22		27
		29		29
		22		22
	20	95	3	118
six1	32	8	1	41
		20		20																	Normal	Reduced	Expanded
	14	9		23															Npr1MO	snai2	24	62
	7	9		16																sox10	20	95	3
	53	46	1	100																six1	53	46	1
																				sox2			39
foxg1	23	11		34															Npr2MO	snai2	53	7
																				sox10	46	3	5
Keratin		23		23																six1	31	2
		8		8
		31		31
								COMBINED
Sox2			18	18
			21	21				NPR2MO	Normal	Reduced	Expanded
			39	39				snai2	53	7
								sox10	46	3	5
								six1	31	2
								foxg1	30	2	1
NPR2MO (50 ng)
	Normal	Reduced	Expanded	N
snai2	33	3		36
	20	4		24
	53	7		60
sox10	23	3	5	31
	23			23
	46	3	5	54
six1	31	2		33
foxg1	30	2	1	33

## Sheet: NPR1-Rescue (fig 5)
XNpr1 mRNA (1/2 ng)
	Normal	Reduced	Expanded	N
snai2	4		14	18
	26		20	46
	30		34	64
sox8	6		14	20
	6		22	28
	5		16	21
	17		52	69
NPR1MO rescue	sox10
	Normal	Reduced	Expanded	N
Npr1MO		74		74
HNPR1	68			68
Npr1MO + HNPR1	43	50		93
SUMMARY - Xnpr1
	Normal	Reduced	Expanded	N
snai2	30		34	64
sox8	17		52	69

## Sheet: A71915 (Fig 5)
			Normal	Reduced	Expanded	N
	snai2	Control	68			68
120nl		A71915	10	25	11	46
	twist1	Control	21			21
		A71915	2	21		23
	six1	Control	59	0		59
		A71915	11	38		49

## Sheet: NppaMO-NppcMO-NppbMO (Fig 6)
NPPAMO (40 ng)
	Normal	Reduced	Expanded	N
snai2	4	12		16	HG					NPP LOF COMBINED
	16	17		33	HG								Normal	Reduced	Expanded	N
	18	10		28	HG						NppaMO	snai2	38	39		77
												sox10	17	57		74
sox10		19		19	AD							six1	31	68		99
	17	38		55	AD							sox2	48		74	122
											NppbMO	snai2	24			24
sox2	16		16	32	HG							sox10	44	12		56
	13		17	30	HG							six1	61			61
	4		17	21	HG						NppcMO	snai2	60	54	2	116
	15		24	39	AD							sox10	10	37		47
												six1	39	63		102
foxi4.1			21	21	HG							sox2	37		33	70
	11	5	15	31	HG
	12	6	11	29	HG
six1	23	47		70	AD
	8	21		29	AD
NPPCMO (40 ng)
	Normal	Reduced	Expanded	N
snai2	11	16		27	HG
	18	11	1	30	HG
	21	14	1	36	HG
	10	13		23	AD
sox10	10	13		23	AD
		24		24	AD
sox2	20		12	32	HG
	16		12	28	HG
	1		19	20	AD
foxi4.1	10	2	16	28	HG
	8	4	23	35	HG
	9	13		22	AD
six1	15	3		18	AD
	16	45		61	AD
	8	15		23	AD
NPPBMO (40 ng)
	Normal	Reduced	Expanded	N
snai2	24			24	AD
sox10	15	12		27	AD
	29			29	AD
six1	40			40	AD
	21			21	AD
NPPCMO - Rescue								NPPCMO - RESCUE COMBINED
six1	Normal	Reduced	Expanded	N							Normal	Reduced	Expanded	N
NPPCMO (40ng/40ng)	6	1		7	2021-03-27				six1	NppcMO	15	14		29
NPPCMO+CNP (30nl)	41	2		43						NppcMO +NPPC	71	10		81
NPPCMO (40ng/40ng)	9	13		22	2021-04-26
NPPCMO+CNP (30nl)	30	8		38
